# Supplementary material for: Challenges and Opportunities of Mass Vaccination Centers in COVID-19 Times: A Rapid Review of Literature
Source: MDPI journal article supplement (doi:10.3390/vaccines9060574), 2021-06-01
Supplement: s1 [file s1]

**Table S1.** Search strategy developed in each database.

| DATABASE       | QUERY                                                                                                                                                                                                                                                                                                                                                                                                                                                                            |
|----------------|----------------------------------------------------------------------------------------------------------------------------------------------------------------------------------------------------------------------------------------------------------------------------------------------------------------------------------------------------------------------------------------------------------------------------------------------------------------------------------|
| PubMed/Medline | ((“Organization and Administration” [MeSH Terms] OR “Health Planning Organizations” [MeSH Terms] OR “process assessment, health care” [MeSH Terms] OR “health performance” [Title/Abstract] OR “health management” [Title/Abstract] OR “healthcare performance” [Title/Abstract] OR “healthcare organization” [Title/Abstract] OR “healthcare management” [Title/Abstract])) AND (“Mass Vaccination” [MeSH Terms] OR “Mass Vaccination” [Title/Abstract])) AND (english[Filter]) |
| Scopus         | (TITLE (“mass vaccination”)) AND ( TITLE-ABS-KEY ( organization OR planning OR management ) )                                                                                                                                                                                                                                                                                                                                                                                    |
| Google Scholar | “mass vaccination centers” OR “mass vaccination center” OR “mass vaccination centre” OR “mass vaccination centres”                                                                                                                                                                                                                                                                                                                                                               |
| medRxiv        | Or full text or abstract or title “mass vaccination”                                                                                                                                                                                                                                                                                                                                                                                                                             |
| EMBASE         | "Mass immunization" AND ("organization and management" OR "health care planning" OR "health care facilities and Services" OR "health care personnel management")                                                                                                                                                                                                                                                                                                                 |

**Table S2.** Articles assessed in full and excluded with reasons.

| References                                                                                                                                                                                                                                                                   | n. studies | Reasons                                                              |
|------------------------------------------------------------------------------------------------------------------------------------------------------------------------------------------------------------------------------------------------------------------------------|------------|----------------------------------------------------------------------|
| Fontanesi, J., et al. 2006 [14]; Nolan, P. et al 2004 [15]; Jarrett, S. W. et al. 1985 [16]; Schindler, J. V. 2008 [17]                                                                                                                                                      | 4          | Full-text not available                                              |
| Kuehnert, P. 2010 [27]; Lee, T. H. et al. 2021 [28]; Meyer, D., M. et al. 2018 [29]; Velimirovic, B. et al. 1981 [30]                                                                                                                                                        | 4          | General consideration about MVC                                      |
| Gerber, R. et al. 2007 [31]; Giot, J. L. et al. 2003 [32]                                                                                                                                                                                                                    | 2          | Legislative aspects of vaccination                                   |
| Arthur, B. C. et al. 2015 [33]; Cho, B. H. et al. 2011 [34]                                                                                                                                                                                                                  | 2          | Cost analysis of vaccination clinics                                 |
| Garske, T. et al. 2014 [35]; Porco, T. C. et al. 2004 [36]                                                                                                                                                                                                                   | 2          | Model predictions to transmission intensity of infection             |
| Matteson, L. M. et al. 2006[37]; Nicoll, A. et al. 2010[38]; Rambhia, K. J. Et al. 2010 [39]; Rebmann, T., T. e al. 2015 [40]; Rebmann, T. et al. 2015 [41]                                                                                                                  | 5          | Development of procedure in case of pandemic                         |
| Privor-Dumm, L. et al. 2020 [42]; Sarma, H. et al. 2019 [43]; Schwartz, B. et al. 2006 [44]                                                                                                                                                                                  | 3          | Analysis of vaccine campaign                                         |
| Dervaux, B. et al. 2003 [18]; Goralnick, E. et al. 2021 [19]; Ha, C. et al. 2016 [20]; Iacobucci, G. et al. 2020 [21]; Olmsted, S. et al. 2006 [22]; Savitz, S. et al. 2007 [23]; Sim, F. et al. 2021 [24]; Sutter, R. W. et al. 2006 [25]; Szilagyi, P. G. et al. 2003 [26] | 9          | Several different aspects non-related with the organization of a MVC |
